1 Elisabetta Versace<sup>1\*</sup>, Jana Schill<sup>1,2</sup>, Andrea Maria Nencini<sup>1</sup>, Giorgio Vallortigara<sup>1</sup>

2

### 3 **Naïve chicks prefer hollow objects**

4 <sup>1</sup> Center for Mind/Brain Sciences, University of Trento (Italy)

5 <sup>2</sup> Universität Osnabrück, Germany

6

#### 7 **Abstract**

8 Cognitive predispositions can influence approaching and avoid responses since the early  
9 stages of life. Young individuals of species that require parental care (e.g. human babies  
10 and chicks of the domestic fowl) are attracted by stimuli that contain features present in  
11 social partners such as face-like configurations, biological motion and self-propulsion.  
12 Studies on human infants showed that 8-month-old babies might possess expectations  
13 about the biological properties of animate entities. It is not clear though whether  
14 previous experience with animate entities had generated those expectations, or whether  
15 they arose spontaneously. We reasoned that naïve chicks of the domestic fowl (*Gallus*  
16 *gallus*) might be a convenient subject to investigate whether the mere property of being  
17 filled vs. hollow triggers unlearned preferences. To this aim we tested preferences of  
18 naïve and imprinted chicks for hollow and closed cylinders of the size and colour that  
19 elicit affiliative responses. We documented an unlearned attraction for hollow stimuli,  
20 showing that the property of being filled is not sufficient to elicit affiliative responses in  
21 chicks. The preference for hollow stimuli could be decreased through filial imprinting, by  
22 exposing naïve chicks to filled stimuli. When chicks were imprinted on stimuli that could  
23 be either filled or hollow, the preference for hollow stimuli emerged again. Further  
24 experiments revealed that hollow objects were mainly attractive by means of depth cues  
25 such as darker innards, more than as places to hide or as objects with high contrast.

26

#### 27 **Introduction**

28 Sensory and cognitive predispositions can help living beings to cope with their environment  
29 by influencing approach and avoid responses (Vallortigara 2012a; Rosa Salva et al. 2015;  
30 Versace and Vallortigara 2015). It is not surprising, hence, to observe in different species  
31 unlearned preferences for specific colours (Schaefer and Hess 1951; Giurfa et al. 1995; Raine  
32 and Chittka 2007; Ham and Osorio 2007), shapes and sizes (Fabricius and Boyd; Schulman et  
33 al. 1970; Ham and Osorio 2007), configurations (Rosa-Salva et al. 2010), dynamics

34 (Vallortigara et al. 2005; Mascalzoni et al. 2010), and odours (Knaden et al. 2012; Dekker et al.  
35 2015; Keeseey et al. 2015; Versace and Reisenberger 2015).

36 Precocial species – in which individuals are mobile from the moment of birth, and can be tested  
37 with little if any experience with their environment– are very convenient to investigate the  
38 unlearned predispositions that can orient living beings since their early stages of life (Versace  
39 and Vallortigara 2015). Soon after hatching, chicks of the domestic fowl (*Gallus gallus*), which  
40 is a nidifugal species, possess some unlearned preferences to approach stimuli that are more  
41 similar to animate social partners (Vallortigara 2012b).

42 Evolved mechanisms to approach objects that possess the features of animate partners would  
43 provide a critical advantage for survival in species that rely on parental care. In line with this,  
44 when given a choice between a stuffed hen vs. a stuffed scrambled hen, chicks prefer to  
45 approach the hen (Johnson and Horn 1988). Behavioural studies have found that this  
46 preference is driven by an unlearned attraction towards the face configuration contained in  
47 the stuffed hen (Johnson and Horn 1988; Rosa-Salva et al. 2010). Moreover, between the  
48 biological movement of a hen or a cat and the rigid motion of a hen rotated on its vertical axis,  
49 chicks prefer to approach the biologically moving object (Vallortigara et al. 2005; Miura and  
50 Matsushima 2016); and between a self-propelled object and an object propelled by another  
51 one, naïve chicks prefer the self-propelled object (Mascalzoni et al. 2010). Overall, chicks  
52 prefer to approach objects which are endowed with more animate features (Rosa Salva et al.  
53 2015; Versace and Vallortigara 2015).

54 Observations on infants (Gelman 1990) suggest that 3-year-old children have a  
55 representation of the insides of animate beings as more likely to be filled than those of  
56 inanimate objects. Studies on human infants (Setoh et al. 2013) have shown that 8-month-old  
57 babies might possess expectations about the biological properties of animate and agentic  
58 entities. In this study infants were more surprised to see that self-propelled and agentic  
59 objects were hollow than when there was no evidence that those objects were hollow. It is not  
60 clear though whether previous experience with animate entities with innards (e.g. the  
61 parents) had generated infants' expectations, or whether they arose spontaneously. We  
62 reasoned that chicks of the domestic fowl (*Gallus gallus*), who are spontaneously attracted by  
63 entities which show cues associated with animacy in the absence of previous experience  
64 (Rosa Salva et al. 2015; Versace and Vallortigara 2015), might be a convenient subject to  
65 identify whether the property of being filled/hollow triggers unlearned preferences.

66 To this aim we tested preferences of naïve chicks (**Experiment 1**) maintained in darkness  
67 (Experiment 1a) or exposed to light (Experiment 1b) for hollow and closed cylinders of the

68 size and colour that elicit filial responses. Moreover, since chicks rapidly learn features of  
69 their social partners by mere exposure through filial imprinting (Horn 1985; McCabe 2013)  
70 (Horn 1985; McCabe 2013), they are a valuable model to study the role of experience in  
71 modifying spontaneous preferences. To this aim we investigated how imprinting modified  
72 unlearned preferences for hollow and filled objects (**Experiment 2**) after imprinting on  
73 hollow objects (Experiment 2a), filled objects (Experiment 2b) and objects who could not be  
74 perceived hollow or filled because their sides were occluded (Experiment 2c).  
75 Since we noticed an overall preference for hollow objects, we investigated whether this  
76 behaviour was elicited by a preference for the stimulus that could better hide the chick  
77 (chicks could enter the hollow stimulus). In **Experiment 3** we checked whether the  
78 preference for hollow stimuli was still present when the stimuli were too small to host and  
79 hide chicks. We tested both dark-reared chicks and chicks exposed to light that had never  
80 seen the test stimuli or any other object of similar size, shape and colour. We observed a  
81 preference for hollow objects. In **Experiment 4** we checked whether the size of the hollow  
82 object was important in determining the preference for hollow objects comparing the  
83 preference for the large and the narrow hollow objects. In **Experiment 5** we checked whether  
84 the darker colour of the shadows present in the innards of hollow objects has a role in driving  
85 preferences for hollow stimuli by comparing preferences for filled objects with a white vs. a  
86 black stopper (Experiment 5a). Since chicks preferred the object with the black stopper, we  
87 tested whether the preference for a hollow stimulus was stronger or weaker than the  
88 preference for a black cap (Experiment 5b). The observed preference for the black cap  
89 stimulus could be explained both by brightness (chicks preferred lower brightness) and by  
90 contrast (chicks preferred greater contrast). To clarify the importance of contrast and  
91 brightness in determining the preference for hollow objects, in **Experiment 6** we used two-  
92 dimensional stimuli with different colour and identical contrast, i.e. a white disk on a black  
93 background vs. a black disk on a white background. If the preference of chicks for hollow vs.  
94 Filled and for Black vs. Hollow was driven by the darker colour (innards or cap), in this  
95 contrast chicks should have chosen the white disk on a black background. If the preference  
96 was driven by contrast, chicks were expected to have no preference. A preference for the  
97 black disk on a white background would be consistent with a preference for darker  
98 objects/innards, possibly a cue of depth.

99  
100

101 **MATERIALS AND METHODS**

102 **Ethical note**

103 This study was approved by the ethical committee of the University of Trento (Organismo  
104 preposto al benessere degli Animali) prot. N. 14-2015 and was licensed by the Ministero della  
105 Salute, authorization n. 1138/2015. The research adhered to the ASAB/ABS Guidelines for the  
106 Use of Animals in Research.

107  
108 **Subjects**

109 The subjects were 24-hour old chicks of the domestic fowl (*Gallus gallus*) of the Hybro strain  
110 (a local hybrid variety of the White Leghorn breed). This breed is sexually dimorphic at the  
111 moment of hatching. The eggs were obtained from a commercial hatchery (Agricola Berica,  
112 Montegalda, Italy), then incubated in complete darkness at 37.7 °C until hatching. Three days  
113 before hatching humidity was increased from 40% to 60%. Eggs hatched in individual boxes  
114 (11 x 8.5 x 14 cm) and chicks could hear their conspecifics but had no visual or tactile contact  
115 with conspecifics until the moment of test. The exact number of chicks used in each  
116 experiment, divided by Sex, is presented in Table 1.

117

| <b>Experiment</b> | <b>Experience</b>   | <b>Test stimuli</b>           | <b>Females</b> | <b>Males</b> |
|-------------------|---------------------|-------------------------------|----------------|--------------|
| Experiment 1a     | Naïve: Dark-reared  | Hollow – Filled (large)       | 57             | 52           |
| Experiment 1b     | Naïve: Light-reared | Hollow – Filled (large)       | 27             | 26           |
| Experiment 2a     | Imprinted: Occluded | Hollow – Filled (large)       | 37             | 27           |
| Experiment 2b     | Imprinted: Filled   | Hollow – Filled (large)       | 59             | 64           |
| Experiment 2c     | Imprinted: Hollow   | Hollow – Filled (large)       | 57             | 67           |
| Experiment 3      | Naïve: Light-reared | Hollow – Filled (narrow)      | 17             | 14           |
| Experiment 4      | Naïve: Dark-reared  | Large – Narrow (hollow)       | 47             | 36           |
| Experiment 5a     | Naïve: Dark-reared  | White – Black (large filled)  | 11             | 16           |
| Experiment 5b     | Naïve: Light-reared | Hollow – Black filled (large) | 19             | 21           |
| Experiment 6      | Naïve: Dark-reared  | White disk – Black disk       | 19             | 17           |

118

119

120 **Test stimuli**

121 Test stimuli are shown in Figure 1. In Experiment 1 and 2 test stimuli were large plastic tubes  
122 (12 cm,  $\varnothing$  4 cm) left open (Hollow, Fig. 1A) or closed with a white cap (Filled, Fig. 1B), with an  
123 orange external surface and a white internal surface. In Experiment 3 we used the same  
124 stimuli with the only difference that the diameter was 2.5 cm (Narrow stimuli are shown in  
125 Fig. 1C and 1D). In Experiment 4 we used Large and Narrow hollow stimuli (Fig. 1A and 1C).  
126 In Experiment 5 we used stimuli similar to those used in Experiments 1 and 2 with the only  
127 difference that one cap was black (Fig. 1E). In Experiment 6 we used a white disk on a black  
128 background, and a black disk on a white background (Fig. 1F) with a diameter of 4 cm located  
129 at 4.5 cm from the ground.

130

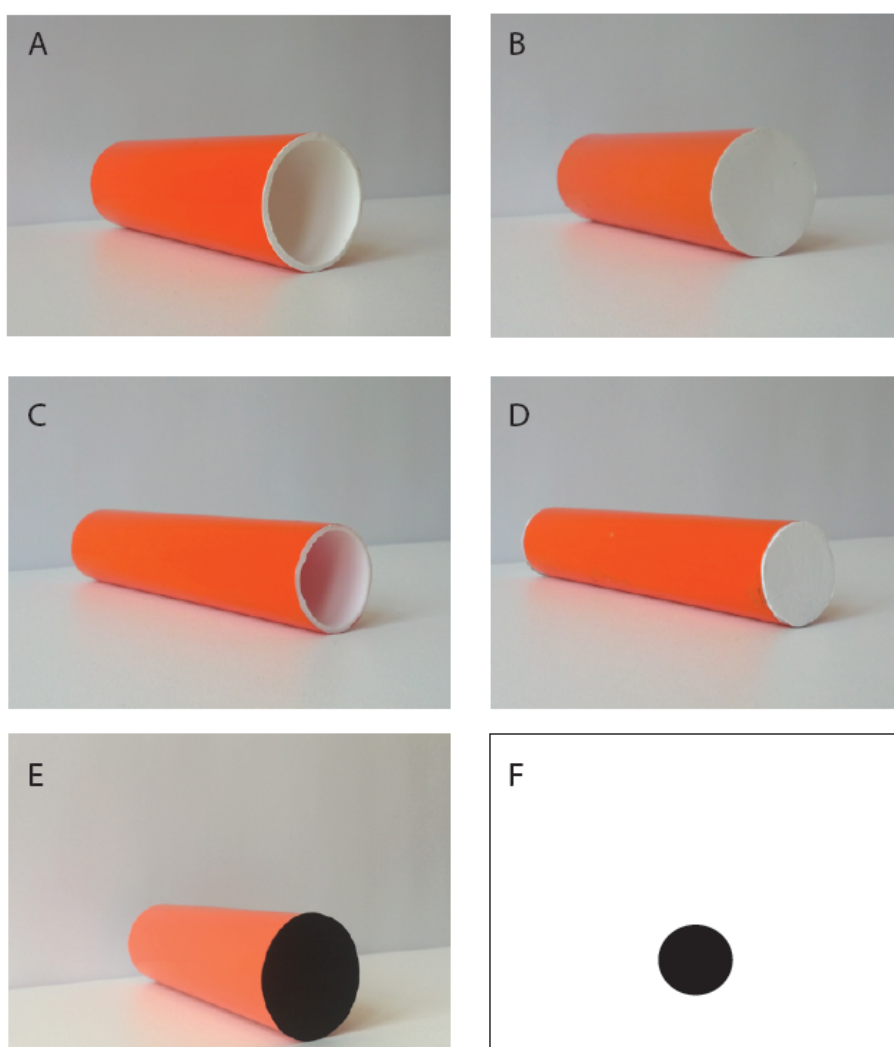

131

132 Figure 1. Stimuli used in Experiment 1 and 2 (A and B), Experiment 3 (C and D), Experiment 4 (A and C),  
133 Experiment 5 (A and E), and Experiment 6 (Panel F shows the Black disk on the white background. The other  
134 stimulus was a White disk on a black background).

135

136 **Imprinting stimuli**

137 In experiment 2 chicks were individually imprinted to orange cylinders (12 cm,  $\varnothing$  4 cm), that  
138 were presented through a 7.5 x 10 cm transparent plastic window. Imprinting lasted  $24 \pm 3$   
139 and was immediately followed by the test. Chicks had no direct interaction with the stimulus  
140 during imprinting and the only interaction with conspecifics was auditory. In the Occluded  
141 condition the cylinder was presented horizontally and the chicks could not see whether it was  
142 hollow or filled because the edges were covered. In the Hollow and Filled condition the hollow  
143 and or filled cylinder were presented perpendicular to the transparent window and the chick  
144 could see whether it was hollow or not.

145

146 **Test apparatus**

147 The experiment took place in a 100 x 30 x 31 cm white arena open on the top (see Figure 2).  
148 Test stimuli were located in the middle of each short side on a white plastic platform that was  
149 4.5 cm high. The box was virtually divided into three areas: a left area (41 cm), a central area  
150 (18 cm) and a right area (41 cm). The white platforms occupied 15 cm in each side area. In  
151 Experiment 4, the platforms were removed and the stimuli were placed directly on the walls  
152 of the apparatus.

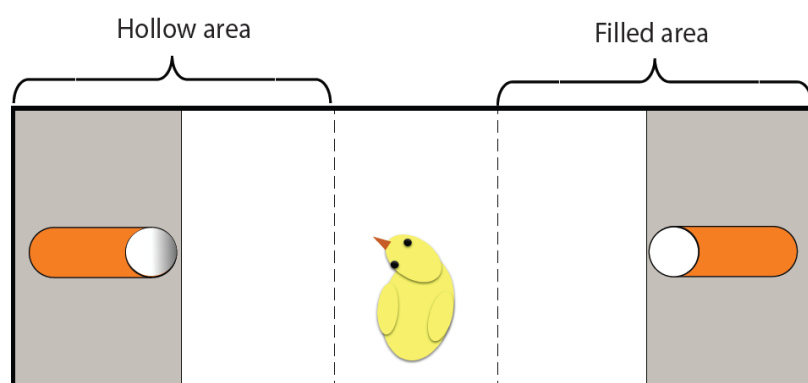

153

154

155 Figure 2. Illustration of the testing apparatus.

156

157 **PROCEDURE**

158 **Imprinting**

159 Soon after hatching, in the imprinting experiments chicks were individually exposed to the  
160 imprinting stimulus for 24 hours before testing under constant light. Imprinting cages were  
161 28 x 38 x 32 cm and the stimulus was presented through a transparent partition (7.5 x 10 cm).  
162 In this way chicks had no direct interaction with the stimuli before testing, similarly to naïve  
163 chicks that had never experienced stimuli like those used during the test.

164 **Test**

165 **Procedure and data analysis**

166 We followed the same procedure in all experiments. Each chick was individually located in the  
167 centre area facing the long side of the box opposite to the experimenter and video recorded  
168 for 360 seconds. We recorded which side area was entered first (First choice) and the seconds  
169 spent in each side area. The chick was considered to have entered a new sector as soon as it  
170 crossed the borderline with both feet. After the testing phase chicks were not used in any  
171 other experiment.

172 We checked whether the first choice was significantly different from the 0.5 chance level  
173 using a Chi-squared test, with alpha = 0.05.

174 For each chick that left the central area we calculated an index of preference for the Hollow  
175 stimulus (Experiments 1, 2 and 3) or an index of preference for the Narrow (Experiment 4) or  
176 Black stimulus (5) in this way:

177

178 *Hollow preference* = (seconds in the Hollow stimulus area) / (seconds in the Hollow stimulus area+seconds in the  
179 Filled stimulus area)

180

181 *Narrow preference* = (seconds in the Narrow stimulus area) / (seconds in the Narrow stimulus area+seconds in  
182 the Large stimulus area)

183

184 *Black preference* = (seconds in the Black stimulus area) / (seconds in the Black stimulus area+seconds in the  
185 White stimulus area)

186

187 For all indices, 1 indicates a full preference for the respective stimulus (Hollow, Narrow,  
188 Black), 0.5 no preference and 0 a full preference for the opposite stimulus (Filled, Large,  
189 White). Since all data had a bimodal distribution with peaks on the extremes (0 and 1) we  
190 used non-parametric statistics to test for significance: the Kruskal-Wallis test to test for  
191 differences between conditions and sexes, and the Mann-Whitney-Wilcoxon one-sample test  
192 vs. the 0.5 chance level.

193

194

195 **RESULTS**

196 **Experiment 1: naïve chicks (dark-reared and light-reared) chicks tested with Hollow vs.**  
197 **Filled stimuli.**

198 We assessed the preference for the hollow/filled object in naïve chicks, namely dark-reared  
199 and light-reared chicks that had never experiences any of the test stimuli before the test.

200 **First choice.** There was no significant difference between dark- and light-reared chicks (Chi-  
201 square test:  $\chi = 0.073$ ,  $df = 1$ ,  $P = 0.79$ ), and in both conditions chicks had the same trend,  
202 therefore we collapsed the two naïve conditions for further analyses. The number of chicks  
203 that approached the Hollow vs. Filled stimulus was significantly different from chance (Chi-  
204 square test:  $\chi = 8.91$ ,  $df = 1$ ,  $P = 0.003$ ) with an overall preference for the Hollow stimulus  
205 (Figure 3A).

206 **Hollow preference.** Considering the Hollow preference index we did not observe any  
207 significant Sex difference (Kruskal-Wallis test:  $H = 0.32$ ,  $df = 1$ ,  $P = 0.57$ ) or Exposure (dark- vs.  
208 light-rearing) difference (Kruskal-Wallis test:  $H = 0.07$ ,  $df = 1$ ,  $P = 0.79$ ), therefore we  
209 collapsed the two naïve conditions for further analyses. We documented a significant  
210 preference for the Hollow stimulus (Mann-Whitney test:  $V = 8053$ ,  $df = 1$ ,  $P = 0.01$ ), see Figure  
211 3B.

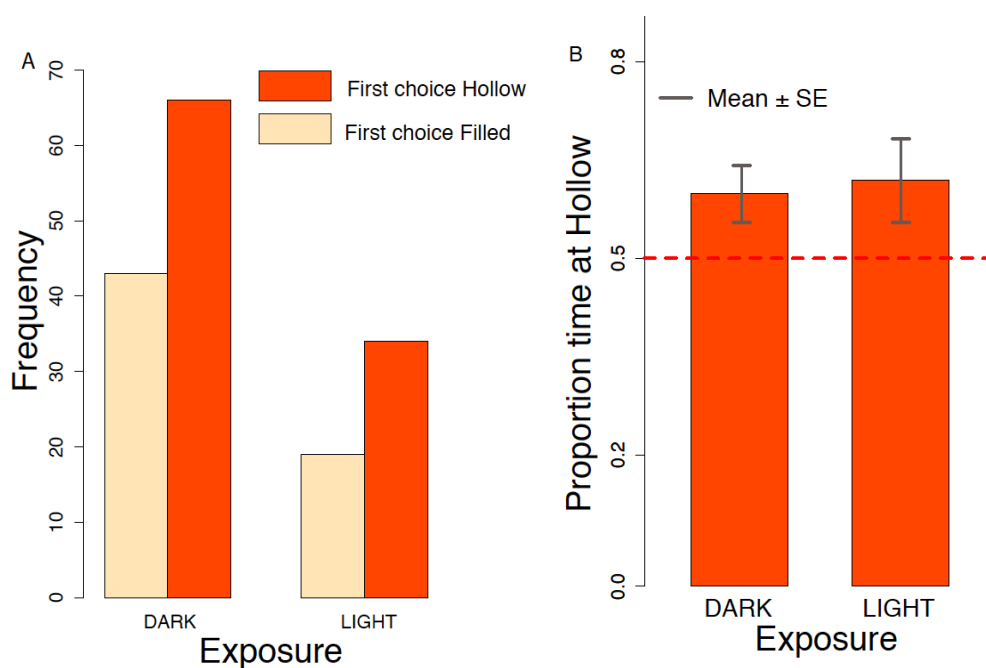

212  
213  
214 Figure 3. **A.** Number of naïve chicks that first approached the Hollow or Filled stimulus in the dark-reared and  
215 light-reared condition. **B.** Proportion of time spent at the Hollow stimulus by dark-reared and light-reared  
216 chicks.

217



218 **Experiment 2: chicks imprinted with Hollow, Filled or Occluded and tested with Hollow**  
219 **vs. Filled stimuli.**

220 To investigate the role of experience in determining the preferences for hollow objects we  
221 investigated the preference for the hollow/filled object in imprinted chicks, namely chicks  
222 that had been exposed to the filled or hollow object, or to an object located horizontally the  
223 sides of which were occluded, so that it did not show whether it was filled or hollow.

224 **First choice.** The number of chicks that approached the Hollow vs. Filled stimulus was  
225 significantly different between imprinting conditions (Chi-square test:  $\chi = 7.15$ ,  $df = 2$ ,  $P =$   
226  $0.028$ ). Chicks imprinted on the Occluded object showed a significant preference for the  
227 hollow object (Chi-square test:  $\chi = 7.56$ ,  $df = 1$ ,  $P = 0.006$ ), whereas chicks imprinted on the  
228 Filled (Chi-square test:  $\chi = 0.40$ ,  $df = 1$ ,  $P = 0.53$ ) and Hollow object (Chi-square test:  $\chi = 2.61$ ,  
229  $df = 1$ ,  $P = 0.11$ ) did not. While the first choice of chicks imprinted on the Occluded object did  
230 not differ from the first choice of chicks imprinted on the Hollow object (Chi-square test:  $\chi =$   
231  $1.35$ ,  $df = 1$ ,  $P = 0.24$ ), there was a significant difference between the first choice of chicks  
232 imprinted on the Occluded object and the first choice of chicks imprinted on the Filled object  
233 (Chi-square test:  $\chi = 6.02$ ,  $df = 1$ ,  $P = 0.014$ ). Only chicks imprinted on the Filled object had a  
234 tendency to choose the Filled object (Figure 4A).

235

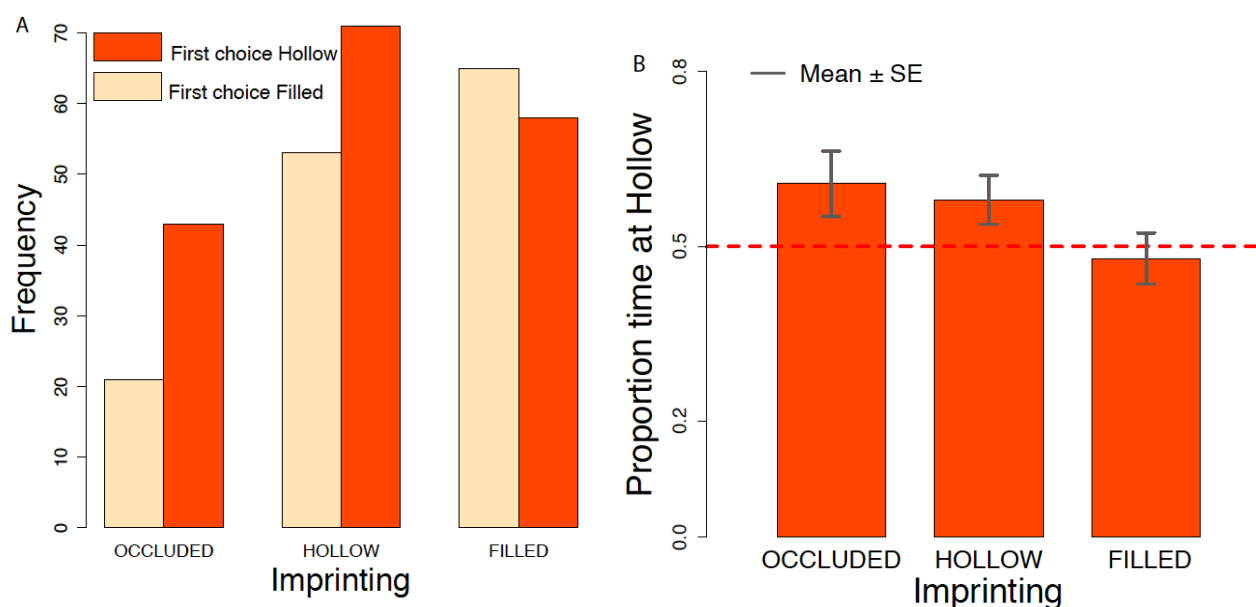

236

237 Figure 4. **A.** Number of imprinted chicks that first approached the Hollow or Filled stimulus after being exposed  
238 to Occluded, Hollow or Filled imprinting stimuli. **B.** Proportion of time spent at the Hollow stimulus for chicks  
239 exposed to Occluded, Hollow or Filled imprinting stimuli.

240

241 **Hollow preference.** Considering the Hollow preference index we did not observe any  
242 significant Sex difference (Kruskal-Wallis test:  $H = 1.60$ ,  $df = 1$ ,  $P = 0.21$ ) or Exposure  
243 difference (Kruskal-Wallis test:  $H = 3.66$ ,  $df = 2$ ,  $P = 0.161$ ). We observed an overall trend for  
244 preferring the the Hollow stimulus (Mann-Whitney test:  $V = 27016.5$ ,  $df = 1$ ,  $P = 0.063$ ), that  
245 turned out highly significant when considering only the chicks imprinted on the occluded and  
246 hollow objects (Mann-Whitney test:  $V = 10721.5$ ,  $df = 1$ ,  $P = 0.009$ ), see Figure 4B.

247

### 248 **Experiment 3: naïve chicks tested with narrow Hollow vs. narrow Filled stimuli.**

249 To investigate the extent and consistency of the hollow preference, we tested the preference  
250 for the hollow/filled object in naïve chicks, using smaller stimuli than those used in  
251 Experiment 1.

252 **First choice.** Chicks confirmed the preference for hollow stimuli (Chi-square test:  $\chi = 17.06$ ,  $df$   
253  $= 1$ ,  $P < 0.001$ ).

254 **Hollow preference.** Considering the Hollow preference index we did not observe any  
255 significant Sex difference (Kruskal-Wallis test:  $H = 1.46$ ,  $df = 1$ ,  $P = 0.23$ ) but an overall  
256 preference for the Hollow stimulus (Mann-Whitney test:  $V = 461$ ,  $df = 1$ ,  $P < 0.001$ ).

257

### 258 **Experiment 4: naïve chicks tested with Large hollow vs. Narrow hollow stimuli.**

259 To investigate whether the preference of young chicks for hollow objects was driven by the  
260 possibility to hide inside hollow objects, we presented naïve dark-reared chicks with a choice  
261 between Large (4 cm in diameter, large enough to hide a chick) and Narrow hollow stimuli  
262 (2.5 cm in diameter, too small to hide a chick).

263 **First choice.** The number of chicks that approached the Large vs. Narrow stimulus was not  
264 significantly different between Sexes (Chi-square test:  $\chi = 0.14$ ,  $df = 1$ ,  $P = 0.71$ ), therefore we  
265 collapsed the data from males and females together. There was no significant preference for  
266 the Large or Narrow stimulus (Chi-square test:  $\chi = 0.108$ ,  $df = 1$ ,  $P = 0.74$ ), suggesting that the  
267 possibility to hide inside the Large hollow stimuli is not the main drive of the preference for  
268 hollow stimuli.

269 **Narrow preference.** Considering the Narrow preference index we did not observe any  
270 significant Sex difference (Kruskal-Wallis test:  $H = 0.11$ ,  $df = 1$ ,  $P = 0.74$ ). Overall we observed  
271 no significant preference for Large or narrow stimuli (Mann-Whitney test:  $V = 1583.5$ ,  $df = 1$ ,  $P$   
272  $= 0.56$ ).

273

274

275 **Experiment 5a: naïve chicks tested with filled White vs. filled Black stimuli.**

276 **First choice.** The number of chicks that approached the White vs. Black stimulus was not  
277 significantly different between Sexes (Chi-squared test:  $\chi = 0.12$ ,  $df = 1$ ,  $P = 0.73$ ), therefore we  
278 collapsed the data from males and females together. We observed a significant preference for  
279 the Black stimulus (Chi-squared test:  $\chi = 16.33$ ,  $df = 1$ ,  $P < 0.001$ ), see Figure 5A.

280 **Black preference.** Considering the Black preference index, we did not observe any significant  
281 Sex difference (Kruskal-Wallis test:  $H = 0.066$ ,  $df = 1$ ,  $P = 0.80$ ). Overall we observed a  
282 significant preference for the Black stimulus (Mann-Whitney test:  $V = 354$ ,  $df = 1$ ,  $P < 0.001$ ),  
283 see Figure 5B.

284

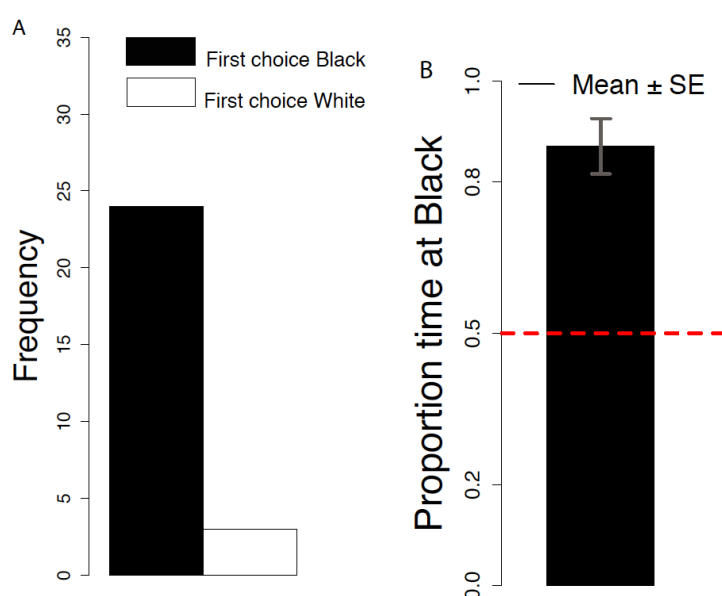

285

286 Figure 5. **A.** Number of chicks that first approached the Black or White stimulus. **B.** Proportion of time spent at  
287 the Black stimulus.

288

289 **Experiment 5b: naïve chicks tested with filled Black vs. Hollow stimuli.**

290 **First choice.** The number of chicks that approached the Hollow vs. Black stimulus was not  
291 significantly different between Sexes (Chi-squared test:  $\chi = 0.307$ ,  $df = 1$ ,  $P = 0.58$ ), therefore  
292 we collapsed the data from males and females together. We observed a significant preference  
293 for the Black stimulus (Chi-squared test:  $\chi = 14.4$ ,  $df = 1$ ,  $P < 0.001$ ), see Figure 6A.

294 **Black preference.** Considering the Black preference index we did not observe any significant  
295 Sex difference (Chi-squared test:  $\chi = 0.818$ ,  $df = 1$ ,  $P = 0.366$ ). Overall we observed a  
296 significant preference for the Black stimulus (Mann-Whitney test:  $V = 174$ ,  $P < 0.001$ ), see  
297 Figure 6B.

298

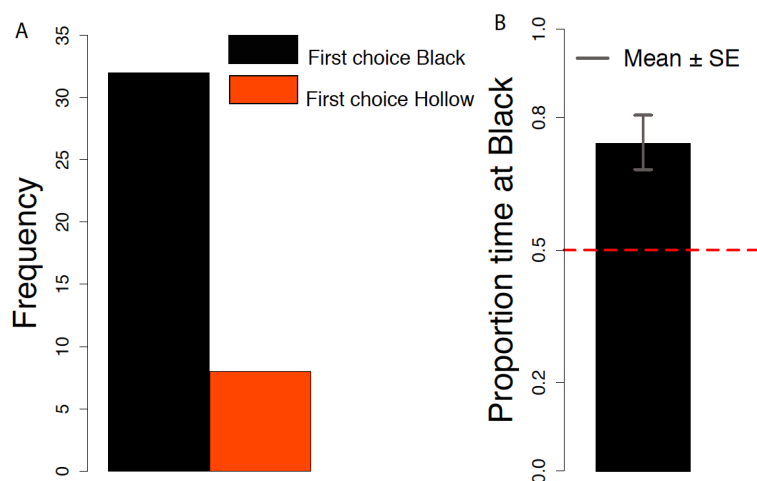

299

300 Figure 6. **A.** Number of chicks that first approached the Black or Hollow stimulus. **B.** Proportion of time spent at  
301 the Black stimulus.

302

303 **Experiment 6: naïve chicks tested with a White disk on a black background vs. a Black**  
304 **disk on a white background.**

305 **First choice.** The number of chicks that approached the White vs. Black disk was not  
306 significantly different between Sexes (Chi-squared test:  $\chi = 0.166$ ,  $df = 1$ ,  $P = 0.68$ ). Overall we  
307 observed a significant preference for the Black stimulus (Chi-squared test:  $\chi = 19.882$ ,  $df = 1$ ,  $P$   
308  $< 0.001$ ), see Figure 7A.

309 **Black preference.** Considering the Black preference index we did not observe any significant  
310 Sex difference (Kruskal-Wallis  $\chi^2 = 0.65$ ,  $df = 1$ ,  $P = 0.42$ ). Overall we observed a significant  
311 preference for the Black stimulus (Mann-Whitney test:  $V = 519$ ,  $df = 1$ ,  $P < 0.001$ ), see Figure  
312 7B.

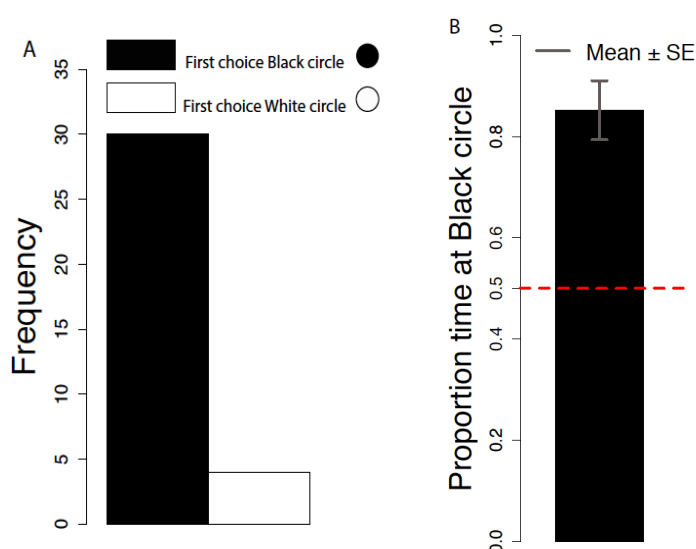

313

314 Figure 7. **A.** Number of chicks that first approached the Black disk on a white background or the White disk on a  
315 black background. **B.** Proportion of time spent at the Black disk on a white background.

## 316 **Discussion**

317 Sensory and cognitive predispositions can help naïve individuals in deciding whether to  
318 approach or avoid novel objects (Versace and Vallortigara 2015). Chicks of the domestic fowl,  
319 which belong to a precocial social species, appear to be endowed with predispositions to  
320 approach animate social partners (Rosa Salva et al. 2015), given that in the absence of  
321 previous experience, young individuals prefer to approach face-like configurations (Rosa-  
322 Salva et al. 2010), self-propelled objects (Mascalzoni et al. 2010) and biologically-moving  
323 objects (Vallortigara et al. 2005). For young chicks, approaching choices are particularly  
324 important as they can influence imprinting. Filial imprinting is a process through which young  
325 chicks develop a strong social attachment, including following responses, to the first  
326 conspicuous objects they encounter in their life (for general reviews on chick's development  
327 and imprinting see Rogers (1995), Bolhuis (1991) and McCabe (2013)). Although chicks can  
328 imprint on a variety of objects – including both natural and artificial objects –, specific colours,  
329 shapes, size and motion types induce stronger imprinting (see Introduction). Chicks'  
330 predispositions produce a bias in favour of naturalistic objects compared to artificial objects,  
331 as shown by the fact that once imprinted on a naturalistic object chicks cannot reverse their  
332 preference for an artificial object (Boakes and Panter 1985; Bolhuis and Trooster 1988) or  
333 have a delayed reversal (de Vos and van Kampen 1993), although the opposite seems to be  
334 easier.

335 Little is known though on the spontaneous preferences of chicks for approaching hollow or  
336 filled objects. This property can be particularly relevant to orient filial responses, because the  
337 presence of innards is associated with animate objects (Gelman 1990), that in the wild include  
338 social partners. Moreover, it has been observed that preschool children can reason about  
339 inside and outside features of objects (Gelman and Wellman 1991), 14-month-old babies  
340 associate an object's behaviour more with internal than with external features (Newman et al.  
341 2008), and preverbal infants (8-month-old) expect animate objects to possess insides (Setoh  
342 et al. 2013). In the case of human babies, spontaneous preferences in the absence of previous  
343 experience with hollow or filled objects have not been assayed. We wondered whether the  
344 mere presence/absence of visible innards might trigger spontaneous approach preferences of  
345 young chicks for the first conspicuous objects encountered in their life, or whether experience  
346 might bias chicks preferences about the innards of social partners. To this aim we tested naïve  
347 and imprinted chicks using as hollow or filled objects orange cylinders of the size that can  
348 elicit filial responses.

349 In our experiments we consistently observed a preference of naïve chicks for approaching  
350 hollow objects. The same preference held for chicks that during imprinting had been exposed  
351 to objects occluded on their sides, that therefore were not explicitly filled or hollow, but were  
352 clearly approached. The preference for hollow objects was reduced when chicks were  
353 imprinted for 24 hours on filled objects, suggesting that chicks are sensitive to this feature of  
354 social partners, and that even a brief experience can modify preferences for hollow/filled  
355 objects. Yet, we did not observe an increase of the preference for hollow objects after  
356 imprinting on hollow objects, and difference in performance between chicks imprinted on  
357 hollow and filled objects was not strong. This suggests that after imprinting takes place, the  
358 difference between hollow and filled imprinting objects is less salient, namely that objects  
359 that differ only for the property of being filled or hollow are not categorized as markedly  
360 different.

361 To establish which property of hollow objects was attracting chicks we ran a series of  
362 subsequent experiments to investigate whether chicks were attracted by hollow objects as  
363 hiding cavities, and/or whether the brightness and contrast of hollow objects were attractive  
364 cues that triggered exploration. Although inexperienced chicks spontaneously recognize the  
365 properties of occluding objects, and search objects behind barriers that completely occlude  
366 them (Chiandetti and Vallortigara 2011), in our experiments chicks did not prefer larger  
367 hollow objects, in which they could more easily hide, to smaller hollow objects. This suggests  
368 that the preference for hollow objects is not mainly driven by the possibility to hide into them.  
369 On the contrary, chicks were more attracted by darker insides or darker “caps”. The attractive  
370 feature of hollow objects could be either the darker part inside the object (its shadows, which  
371 are a depth cue), or the higher contrast introduced by the presence of shadows. If the contrast  
372 but not the lower brightness was attracting the chicks, we expected them to have no  
373 preference when facing a choice between two scenes with the same (but opposite) contrast: a  
374 white disk on a black background and a black disk on a white background. Instead, in this  
375 setting chicks strongly preferred the black disk on a white background, suggesting that lower  
376 brightness of an object but not the contrast per se is attractive for chicks.

377 To sum up, naïve chicks exhibited a consistent preference for hollow objects, which was  
378 mainly mediated by the lower brightness on the insides, probably interpreted as a depth cue.  
379 This preference could be modified by imprinting experience, simply by exposing chicks to a  
380 filled object for 24 hours. At least for still objects such as the stimuli used in our experiments,  
381 the property of being “filled” does not make objects more attractive as social partners for  
382 chicks of the domestic fowl. Further experiments should clarify whether the preference for

383 hollow vs. filled objects is modified introducing cues of animacy, such as the presence of  
384 movement or face configurations in the presented objects.

385

## 386 REFERENCES

- 387 Boakes R, Panter D (1985) Secondary imprinting in the domestic chick blocked by previous  
388 exposure to a live hen. *Anim Behav* 33:353–365. doi: 10.1016/S0003-3472(85)80059-2
- 389 Bolhuis JJ (1991) Mechanisms of avian imprinting: a review. *Biol Rev* 66:303–345. doi:  
390 10.1111/j.1469-185X.1991.tb01145.x
- 391 Bolhuis JJ, Trooster WJ (1988) Reversibility revisited: stimulus-dependent stability of filial  
392 preference in the chick. *Anim Behav* 36:668–674. doi: 10.1016/S0003-3472(88)80149-0
- 393 Chiandetti C, Vallortigara G (2011) Intuitive physical reasoning about occluded objects by  
394 inexperienced chicks. *Proc R Soc B Biol Sci* 278:2621–7. doi: 10.1098/rspb.2010.2381
- 395 de Vos GJ, van Kampen HS (1993) Effects of primary imprinting on the subsequent  
396 development of secondary filial attachments in the chick. *Behaviour* 3-4:245–263. doi:  
397 10.1017/CBO9781107415324.004
- 398 Dekker T, Revadi S, Mansourian S, et al (2015) Loss of *Drosophila* pheromone reverses its role  
399 in sexual communication in *Drosophila sukukii*. *Proc Biol Sci* 282:20143018. doi:  
400 10.1098/rspb.2014.3018
- 401 Fabricius E, Boyd H Experiments on the following-reaction of ducklings. *Wildfowl Trust Annu*  
402 *Rep* 84–89.
- 403 Gelman R (1990) First principles organize attention to and learning about relevant data:  
404 Number and the animate-inanimate distinction as examples. *Cogn Sci* 14:79–106. doi:  
405 10.1016/0364-0213(90)90027-T
- 406 Gelman SA, Wellman HM (1991) Insides and essences: Early understandings of the non-  
407 obvious. *Cognition* 38:213–244.
- 408 Giurfa M, Nunez J, Chittka L, Menzel R (1995) Colour preferences of flower-naive honeybees. *J*  
409 *Comp Physiol A*. doi: 10.1007/BF00192415
- 410 Ham AD, Osorio D (2007) Colour preferences and colour vision in poultry chicks. *Proc R Soc B*  
411 *Biol Sci* 274:1941–8. doi: 10.1098/rspb.2007.0538
- 412 Horn G (1985) *Memory, imprinting, and the brain an inquiry into mechanisms*. Clarendon  
413 *Press, Oxford*
- 414 Johnson MH, Horn G (1988) Development of filial preferences in dark-reared chicks. *Anim*  
415 *Behav* 36:675–683. doi: 10.1016/S0003-3472(88)80150-7
- 416 Keesey IW, Knaden M, Hansson BS (2015) Olfactory Specialization in *Drosophila sukukii*

- 417 Supports an Ecological Shift in Host Preference from Rotten to Fresh Fruit. *J Chem Ecol*.  
418 doi: 10.1007/s10886-015-0544-3
- 419 Knaden M, Strutz A, Ahsan J, et al (2012) Spatial Representation of Odorant Valence in an  
420 Insect Brain. *Cell Rep* 1:392–399. doi: 10.1016/j.celrep.2012.03.002
- 421 Mascalzoni E, Regolin L, Vallortigara G (2010) Innate sensitivity for self-propelled causal  
422 agency in newly hatched chicks. *Proc Natl Acad Sci U S A* 107:4483–5. doi:  
423 10.1073/pnas.0908792107
- 424 McCabe BJ (2013) Imprinting. *Wiley Interdiscip Rev Cogn Sci* 4:375–390. doi:  
425 10.1002/wcs.1231
- 426 Miura M, Matsushima T (2016) Biological motion facilitates imprinting.
- 427 Newman GE, Herrmann P, Wynn K, Keil FC (2008) Biases towards internal features in infants’  
428 reasoning about objects. *Cognition* 107:420–32. doi: 10.1016/j.cognition.2007.10.006
- 429 Raine NE, Chittka L (2007) The Adaptive Significance of Sensory Bias in a Foraging Context:  
430 Floral Colour Preferences in the Bumblebee *Bombus terrestris*. *PLoS One* 2:e556. doi:  
431 10.1371/journal.pone.0000556
- 432 Rogers LJ (1995) *The Development of Brain and Behaviour in the Chicken*. CAD International,  
433 Wallingford
- 434 Rosa Salva O, Mayer U, Vallortigara G (2015) Roots of a social brain: Developmental models of  
435 emerging animacy-detection mechanisms. *Neurosci Biobehav Rev* 50:150–168. doi:  
436 10.1016/j.neubiorev.2014.12.015
- 437 Rosa-Salva O, Regolin L, Vallortigara G (2010) Faces are special for newly hatched chicks:  
438 evidence for inborn domain-specific mechanisms underlying spontaneous preferences  
439 for face-like stimuli. *Dev Sci* 13:565–77. doi: 10.1111/j.1467-7687.2009.00914.x
- 440 Schaefer H, Hess H (1951) Color Preferences in Imprinting Objects. *Z Tierpsychol* 16:161–172.
- 441 Schulman AH, Hale BE, Graves H. (1970) Visual stimulus characteristics for initial approach  
442 response in chicks (*Gallus domesticus*). *Anim Behav* 18:461–466.
- 443 Setoh P, Wu D, Baillargeon R, Gelman R (2013) Young infants have biological expectations  
444 about animals. *Proc Natl Acad Sci U S A* 110:15937–42. doi: 10.1073/pnas.1314075110
- 445 Vallortigara G (2012a) Core knowledge of object, number, and geometry: A comparative and  
446 neural approach. *Cogn Neuropsychol* 29:213–236. doi: 10.1080/02643294.2012.654772
- 447 Vallortigara G (2012b) Aristotle and the chicken: Animacy and the origins of beliefs. In: Fasolo  
448 A (ed) *The Theory of Evolution and its Impact*. Springer International Publishing, New  
449 York, pp 189–200
- 450 Vallortigara G, Regolin L, Marconato F (2005) Visually inexperienced chicks exhibit



451 spontaneous preference for biological motion patterns. PLoS Biol 3:e208. doi:  
452 10.1371/journal.pbio.0030208

453 Versace E, Reisenberger J (2015) Large-scale assessment of olfactory preferences and  
454 learning in *Drosophila melanogaster*: behavioural and genetic components. PeerJ  
455 3:e1214. doi: 10.7717/peerj.1214

456 Versace E, Vallortigara G (2015) Origins of knowledge: Insights from precocial species. Front  
457 Behav Neurosci 9:338. doi: 10.3389/fnbeh.2015.00338

458

459 **Acknowledgements**

460 G.V. was funded by the ERC Advanced Grant ERC-2011-ADG\_20110406, Project No:  
461 295517, PREMESOR

462
